# Supplementary material for: Adult hippocampal neurogenesis occurs in the absence of Presenilin 1 and Presenilin 2
Source: PubMed Central journal article supplement (PMC6299003; doi:10.1038/s41598-018-36363-7), 2018-12-18
Supplement: 41598_2018_36363_MOESM1_ESM.pdf [file 41598_2018_36363_MOESM1_ESM.pdf]

## Supplemental Documents

### **Adult hippocampal neurogenesis occurs in the absence of *Presenilin 1* and *Presenilin 2***

Jagroop Dhaliwal<sup>1</sup>, Timal S. Kannangara<sup>1</sup>, Michael Vaculik<sup>1</sup>, Yingben Xue<sup>1</sup>, Keren L. Kumar<sup>1</sup>, Amanda Maione<sup>1</sup>, Jean-Claude Béïque<sup>1</sup>, Jie Shen<sup>2</sup> and Diane C. Lagace<sup>1\*</sup>

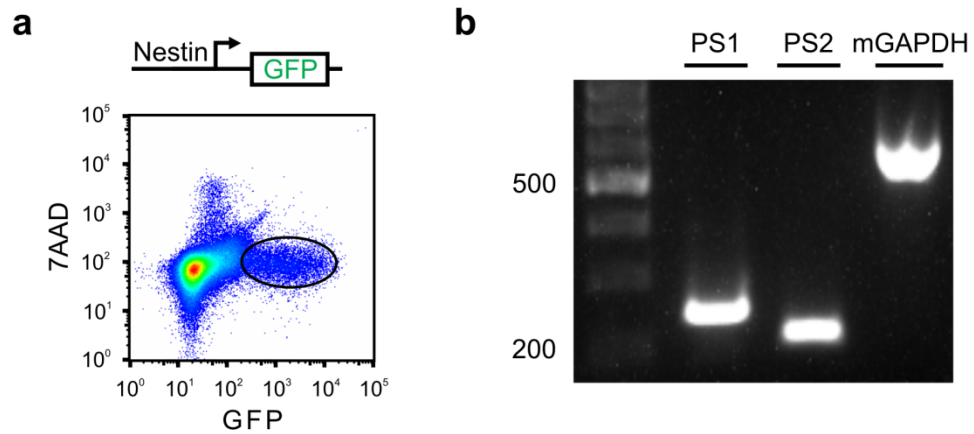

**Supplemental Figure 1. Presenilins are expressed in Nestin-GFP-expressing stem and precursor cells in the dentate gyrus.** **a)** Density-scatter plots of FACS-isolated cells from the dentate gyrus of adult Nestin-GFP mice. **b)** Sorted GFP+ cells express mRNA for PS1, PS2 and control mGAPDH.

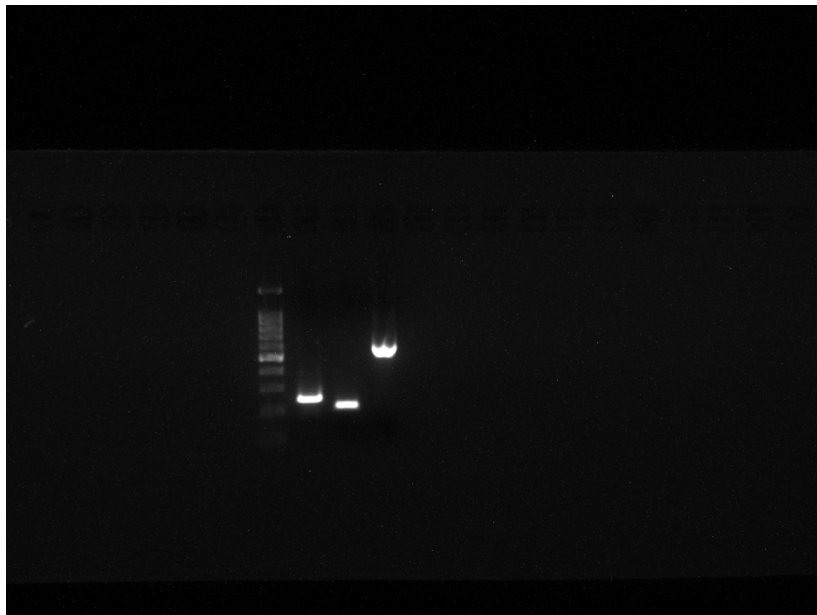

**Supplemental Figure 2. Full-length Gel presented in Supplemental Figure 1.**

|                                                                     | <b>WT</b>        | <b>Control</b>   | <b>vDKO</b>      |
|---------------------------------------------------------------------|------------------|------------------|------------------|
| <b>Membrane Resistance (<math>R_M</math>; <math>M\Omega</math>)</b> | 341.3 $\pm$ 78.0 | 417.4 $\pm$ 54.0 | 426.8 $\pm$ 71.6 |
| <b>Resting Membrane Potential (<math>V_{Rest}</math>; mV)</b>       | -81.02 $\pm$ 2.1 | -82.5 $\pm$ 2.4  | -75.5 $\pm$ 2.8  |
| <b>Estimated Cell Capacitance (<math>C_M</math>; pF)</b>            | 45.8 $\pm$ 8.0   | 48.8 $\pm$ 3.5   | 61.7 $\pm$ 19.7  |
| <b>Estimated Tau (ms)</b>                                           | 33.2 $\pm$ 3.7   | 46.4 $\pm$ 6.9   | 37.1 $\pm$ 5.7   |
| <b>Action Potential Amplitude (First Two Spikes) (mV)</b>           | 109.5 $\pm$ 5.6  | 117.2 $\pm$ 1.6  | 113.7 $\pm$ 3.5  |
| <b>Time to Peak (First Two Spikes) (ms)</b>                         | 1.92 $\pm$ 0.03  | 1.62 $\pm$ 0.03  | 1.70 $\pm$ 0.07  |
| <b>Action Potential Amplitude (Last Two Spikes) (mV)</b>            | 107.3 $\pm$ 5.0  | 103.3 $\pm$ 2.5  | 100.2 $\pm$ 4.4  |
| <b>Time to Peak (Last Two Spikes) (ms)</b>                          | 2.04 $\pm$ 0.05  | 1.86 $\pm$ 0.05  | 2.03 $\pm$ 0.11  |
| <b>N (cells/mice)</b>                                               | 5/2              | 7/3              | 9/3              |

**Supplemental Table 1. Electrophysiological properties of GFPCre+ virally-labeled NPCs.** Related to Figure 4. Data are presented as the mean  $\pm$ SEM.
